# Supplementary material for: Serum uric acid level is correlated with the clinical, pathological progression and prognosis of IgA nephropathy: an observational retrospective pilot-study
Source: PeerJ. 2020 Nov 3;8:e10130. doi: 10.7717/peerj.10130 (PMC7646298; doi:10.7717/peerj.10130)
Supplement: Supplemental Information 1 [file peerj-08-10130-s001.xlsx]

## Sheet: Sheet1
Specimen No.	Gender	Age (years)	Body weight (kg)	MAP (mm Hg)	WBC（*109/L）	Hb（g/L）	PLT (*109/L)	ALT（U/L）	AST（U/L）	TP(g/l)	ALB(g/l)	TC(mmol/l)	TG(mmol/l)	HDL-L(mmol/l)	LDL-L(mmol/l)	UA(umol/L)	BUN(mmol/L)	Scr(μmol/l)	eGFR(EPI)	APTT (s)	FDP (mg/l)	24-hour urine protein (mg/d)	IgA(g/l)	IgG(g/l)	IgM(g/l)	C3(g/l)	C4(g/l)
2015002	male	31	-	105.333	6.05	171	273	24	21	72.9	42.6	4.65	12	0.58	1	498.4	5.45	61	126.491	36.2	3.03	1111	4.18	10.1	1.5	1.28	0.99
2015008	male	46	-	99	7.79	140	270	19	19	68.6	36	4.58	3.75	0.8	2.18	458.8	6.27	107	71.3345	34.9	4.77	3507.8	5.4	9.8	1.07	1.16	0.26
2015009	female	35	-	88.6667	9.02	131	242	10	12	72.7	38.8	5.57	2.56			322.6	6.7	80	82.5534	31.9	4.23	868	1.8	13.4	1.38	0.99	0.31
2015010	female	22	47	90.6667	5.65	119	190	191	133	64.7	35.6	3.6	0.83			217.4	5.07	60	124.639	37.8	3.48	3879	2.67	8.4	0.91	0.83	0.24
2015015	male	22	67	116.667	5.89	141	202	15	14	75.7	47.5	3.98				328.2	4.49	77	122.445	35.2	3.03	193.6	4.15	12	2.17	0.68	0.14
2015016	female	26	58	89	6.81	137	237	13	14	80.4	46.1	3.82	1.9	1.15	2.25	328.3	4.26	55	124.705	40.2	2.41	174	4.17	13.8	2.84	0.67	0.14
2015018	female	54	67.4	105.667	7.14	112	199	9	14	67.5	36.9	4.67	2.87	0.98	2.56	374.5	7	141	36.4083	33.1	2.8	1697.3	2.99	14.3	0.8	0.86	0.21
2015019	female	25	49.7	86.3333	9.32	120	218	10	11	58.3	34.3	5.84	0.68	2.11	3.2	182.2	4.36	59	122.717	37.3	2.43	1053
2015020	female	25	59	96.6667	8.34	132	351	12	15	63.7	32.8	6.35	4.21	1.21	3.28	352.7	6.38	98	69.2924	35.7	4.13	3046.4	4.45	7.5	2.15	1.03	0.23
2015022	male	36	66	96.3333	6.27	152	158	33	19	75.9	46.5	4.07	1.54	1.35	2.28	367.1	4.77	81	107.145	32.7	3.25	473.2	2.16	13.6	1.59	0.89	0.21
2015036	female	18	51	87.6667	7.24	122	170	11	14	64.1	34.5	3.41	0.97	0.99	1.94	274.2	3.38	88	82.8998	42.1	3.98	2216.2	4.54	8.5	1.26	0.99	0.26
2015038	male	32	85	88.3333	14.58	157	232	51	24	66	35.2	4.5	6.95	0.81	1.55	353.4	6.55	90	97.0188	42.6	3.42	2261.6	4.01	12.8	1.14	0.99	0.18
2015040	male	39	61.5	97	4.07	135	201	10	15	61.7	38.3	2.7	2.4	0.64	1.33	381.6	5.5	117	67.2579	40.7	2.09	770	3.16	10.1	0.52	0.54	0.16
2015043	male	32	62.4	77.6667	5.22	133	166	4	16	73.4	44	3.67	0.74			383.3	5.13	93	93.2479	39.4	3.23	358.4	3.37	10.1	2.21	0.78	0.17
2015046	male	25	64	99.3333	5.7	154	211	6	18	76.4	45.8	4.81	0.91	1.61	2.78	307.7	3.59	89	103.295	39.3	2.52	1265.1
2015056	female	40	-	101	4.35	114	219	10	16	65.5	39.8	5.2				151.4	5.1	43	122.558	40.5	2.63
2015058	female	43	65.8	110.333	9.18	159	270	9	13	65.1	35.7	4.17	1.16	1.08	2.6	305.7	6.05	89	68.6044	34.9	3.79	2497.6	3.39	10.4	2.24	0.8	0.13
2015059	female	33	50	82	4.66	123	218	15	15	63	36.8	3.37	1.31			219.2	3.91	73	93.5222	35.5	2.33	478.9	2.26	10	1.1	0.79	0.16
2015061	female	30	-	95.3333	6.14	125	293	15	17	67.2	39.4	4.51	2.63	1.07	2.54	303.8	4.71	76	90.9747	41.6	3.1	618	3.76	9.7	1.01	0.82	0.19
2015063	female	29	58.5	101.667	7.62	131	277	12	15	86.9	48.5	5.3	2.36	1.06	3.01	495.9	8.66	137	44.9345	40.5	4.37	1058.4	1.63	15.2	2.59	0.91	0.2
2015067	male	26	-	106	7.41	141	228	17	16	78.7	48.8	3.71	1.56	1.06	2.32	335.2	4.99	92	98.5417	35.1	3.07	283.8	4.24	13.9	1.56	0.94	0.22
2015069	female	31	55	98.6667	5.04	93	294	1	17	46.6	26.6	5.55	0.94	1.36	3.62	479.7	7.04	132	46.3447	35.5	3.53	2346.4	2.14	6.1	0.49	0.63	0.21
2015073	female	28	66.5	82.6667	7.16	122	192	53	24	62.6	36	5.03				330.7	4.16	77	90.8152	33.3	3.58		2.16	7.5	1.82	0.76	0.16
2015075	female	22	-	108	7.2	92	404	28	25	61.7	30.5	9.43	2.45	0.97	6.85	446.9	4.57	124	53.2456	45	5.85	4353.8
2015083	male	19	58	73.6667	4.77	123	238	7	18	67.9	39.2	4.21				365.8	4.41	80	123.104	40.1	3.78	2301.2	2.55	8.9	0.49	0.59	0.16
2015084	male	19	60	103.333	7.06	146	323	35	20	79.7	46.6	3.74				374	3.76	92	103.508	33.6	2.98	535.6	2.89	12.8	1.38	0.9	0.14
2015085	male	26	93	91.3333	9.33	154	273	12	12	62.6	39.2	4.13	4.65			453.4	3.97	98	91.295	40.4	2.95		1.59	6.4	0.63	0.78	0.24
2015087	male	28	70	100.333	7.29	182	233	19	17	73.1	46.1	6.28	3.05			511.3	7.16	134	61.6692	37.6	2.99	3017.7	3.55	7.9	0.98	1.07	0.21
2015090	female	47	72	93	9.15	105	270	8	12	71.7	35.5	3.84				342.5	7.49	129	42.5852	39.8	4.26	1120.3	3.23	14.5	2.98	1.12	0.26
2015100	female	29	59	78.6667	5.3	135	235	6	16	69.8	43.1	3.95	1.5	1.94	3.24	260.6	3.01	58	119.989	38.7	2.7	426				0.8	0.16
2015108	female	34	66	93.3333	7.95	127	317	15	17	75.1	44.1	4.86	3.52	1.52	2.77	359.3	4.64	62	113.334	37.7	3.94	1027.5	3.55	13.1	1.39	1.03	0.25
2015109	female	23	54	93	5.88	139	301	14	14	77.6	42.3	4.33				357.3	6.07	45	136.053	36.7	3.61	483	3.13	14	1.27	1.02	0.28
2015110	male	46	-	83.6667	5.75	175	193	34	25	83.2	48	4.28	0.89			349.9	6.35	74	105.152	35.8	3.56	402.9				0.49	0.18
2015112	male	28	76.5	80.6667	5.86	119	245	15	13	69.7	41	3.59	2.64			372.6	6.95	138	59.5147	41.7	3.05	446	5.76	10.7	0.97	0.8	0.19
2015116	female	42	-	96.3333	8.46	136	197	22	27	71.2	42.5	4.86	2.54	1.11	2.78	257.7	5.83	55	111.448	39.1	3.47	505
2015120	female	39	57	80.6667	5.93	109	296	11	16	77	41.5	4.29	6.48	0.94	1.57	304	4.57	94	66.0474	37.1	3.8	750.2	3.69	14.5	1.96	0.88	0.3
2015122	female	39	81	92.6667	7.1	122	306	58	43	69.6	39.8	4.72	2.17			247.9	3.79	74	88.1995	35.4	4.23	427.6	1.03	10	2.52	1.04	0.2
2015128	female	42	70	102.333	9.18	119	285	9	11	70.7	38.1	4.62	1.6			241.1	5.16	68	95.6559	41.6	3.39	194.4	4.37	12.9	3.21	0.94	0.19
2015132	female	27	61	81.3333	7.43	132	285	19	18	81.3	48.2	4.5	1.59	1.32	2.72	391.5	6.81	37	141.083	36	3.37	440	3.87	14.1	2.06	1.38	0.19
2015133	male	22	63.6	95	7.56	123	258	8	10	68.8	37.8	3.44	1.32	0.71	2.26	359.3	5.41	89	105.495	41.8	3.76	336	6.18	10.9	1.02	0.84	0.22
2015134	male	41	84	102.333	6.71	149	159	14	12	66.4	37.7	4.19	2.09	1.06	2.61	287.1	5.33	103	77.3674	40.2	3.96	822	2.99	11.6	0.83	1	0.27
2015135	female	25	62	94.6667	6.55	129	286	18	19	67.6	38	5.31	2.45	1.09	3.39	441.4	3.34	64	115.986	36	3.55	3292.2	3.77	9.3	1.2	1.2	0.31
2015136	male	24	81	103	10.8	148	146	38	23	71.2	41.4	5.55	5.96			426.4	5.52	82	114.852	34.3	2.58	546.7	5.6	9.7	0.92	1.14	0.24
2015139	female	46	64	113.667	11.36	117	313	12	10	57	33.4	5.26	1.68			68.6	5.06	62	104.172	26.5	3.17	2035.8	2.55	5.2	1.08	1.01	0.21
2015142	male	31	67	93.3333	6.09	147	174	9	13	71.8	42.8	3.58	1.2	1.13	1.87	327.9	4.57	78	114.335	41.7	2.32	214.5	4.49	9	0.96	0.77	0.18
2015144	female	43	59	103	7.06	92	263	10	17	74.1	36.8	4.98	0.89	1.12	3.31	266.8	7.85	74	85.7558	40.6	3.61	1846.6	4.59	15.5	2.01	0.9	0.19
2015145	female	54	54	108	7.49	131	233	14	17	74.8	42.9	5.84	1.8	1.12	4.08	313.4	5.24	92	61.008	28.9	2.74	1406.4	4.82	14	1.36	1.03	0.23
2015149	female	58	64	83.6667	6.79	112	169	17	21	62.6	32.6	5.85	1.59	1.59	3.63	327	5.01	91	60.1066	38.7	4.57	344.4	3.27	8.2	1.07	1.07	0.2
2015150	female	40	59	90	7.11	145	207	23	20	75	42.7	5.13	1.32	1.61	3.19	336.9	7.27	101	60.1301	44.9	3.41	439.4	1.6	14.8	2.05	0.92	0.28
2015152	male	37	59.5	105.667	5.83	157	210	9	15	73.9	43.7	4.87	1.52	1.42	2.91	371.3	5.75	102	80.5163	37.8	2.88
2015153	male	61	59.5	85.6667	13.47	137	183	36	18	51.1	29.9	9.03	2.07	2.67	5.86	248.1	7.05	94	75.0847	27.3	3.08	4510.4	1.63	4	0.97	1.06	0.24
2015159	male	21	-	84.6667	5.91	163	199	21	19	71.3	43.9	4.52	1.26	1.11	2.82	444.6	4.75	85	112.312	35.5	2.84	2665.6	2.03	11.6	1	0.93	0.23
2015162	female	46	50	91.6667	7.79	119	221	8	12	64.9	34.5	6.25	2.18	1.07	4.2	360.5	6.87	122	45.8779	38.2	3.85	1177.2
2015168	female	39	53	77.3333	5.94	121	177	11	19	72.2	40.4	5.72	2.91	0.99	3.69	189.4	4.91	82	77.9052	38.6	3.17	308	3.02	14.9	1.45	0.75	0.12
2015173	male	24	85	103	16.97	148	296	35	21	44.5	23.4	4.34	1.75	1.22	2.34	427.2	9.9	189	41.8503	37.2	3.5	10735.2	2.24	3.5	1.74	0.63	0.18
2015177	male	26	72	104	7.98	138	207	63	27	64.7	36.4	5.64	5.72	0.77	2.42	432.9	5.69	147	55.9182	37.1	3	2055.3	4	10.5	1.27	1.03	0.24
2015183	female	20	53.5	81	5.52	138	211	10	12	70.6	44.1	4.34	0.78	1.62	2.48	186.9	5.54	46	137.95	37.2	2.55	624	2.48	7.9	0.76	0.9	0.13
2015186	male	15	76	103	9.07	137	287	37	31	71.6	43.9	3.88	0.96	1.79	1.95	349.5	4.59	90	109.325	40.3	2.95	441	5.63	11.3	1.52	0.87	0.1
2015192	female	35	60	102.667	7.8	137	211	13	11	69.2	41.7	4.77	1.77	1.11	3.23	312.5	5.58	56	116.373	40.7	2.83	455	0.99	9.3	2.79	1.04	0.19
2015193	male	27	56	85.3333	6.18	118	198	7	15	71.3	42.8	3.88	2.25	0.94	2.07	535.7	4.81	82	112.457	40.8	2.49	777.6	5.07	9.9	0.85	0.82	0.18
2015199	female	35	56.6	70.6667	5.21	94	247	10	14	71.8	34.4	5.2	1.25	1.48	2.85	336.2	11.68	178	31.3915	35.1	3.95	510	5.53	14.2	1.75	0.78	0.19
2015200	female	30	53	103	8.91	102	290	10	16	51	28.7	8.67				197.7	4.65	74	93.9557	27.5	3.95	5402.5
2015202	female	50	53	106	6.32	137	218	14	14	73.2	43.1	7.43	2.15	1.62	4.18	210.9	5.17	57	104.127	32.9	3.15	400.9	2.4	9.2	1.24	0.89	0.22
2015211	female	29	40	83.3333	6.9	88	250	9	13	63.1	33.7	3.97	1.32	1.15	2.53	369.6	3.79	91	73.6875	37.3	2.98	999.6
2015214	male	63	71	91.3333	5.33	118	234	5	16	57.8	27	3.98	0.83	1.24	2.12	445.8	5.82	99	69.5407	39.3	3.8	1380	3.96	10.7	0.84	0.73	0.18
2015217	female	20	39	112.333	9.51	128	311	10	17	73.6	38.9	5.42	1.91			361.6	5.38	121	55.6217	37.1	4.57	2428.8	1.64	10.1	1.77	0.88	0.16
2015225	female	52	-	98.6667	5.91	138	174	39	28	66.7	37.8	4.96	3.06	0.84	3.09	317.2	4.3	59	101.516	34.9	3.17	2251.2
2015228	female	24	46	73.3333	6.28	136	270	14	19	73	46.3	4.18	1.08	1.06	2.88	244.2	4.51	58	124.279	38.5	2.52	113.3	2.52	1.63	11	2.42	0.73
2015240	female	46	69	104	7.65	127	217	15	17	73.7	41.5	5.27	1.19	1.18	3.74	304.5	3.25	67	94.6864	41.9	2.86	283.9	3.41	13.8	0.96	0.92	0.24
2015242	female	35	-	75	7.22	152	192	13	17	73.7	43.8	4.83	2.16			308.4	3.23	58	115.037	37.3	3.25	654.9	2.33	11.8	2.17	1.07	0.22
2015246	male	27	64	90	9.88	163	240	12	15	80.8	46.9	5.77	1.43	1.22	3.93	496.8	4.96	91	99.1534	40.1	3.31	664.1	3.17	14.3	1.21	1.25	0.19
2015249	female	26	-	98.3333	5.96	95	161	9	15	57.5	33.6	4.41	1.08			327.4	5.09	78	90.6744	31.8	3.58	1986.4	4.09	6.7	0.47	0.88	0.3
2015250	female	26	50.8	95.3333	9.15	138	307	6	14	53	24.9	9.41	2.69	1.25	6.62	259.9	6.55	147	42.1445	37.5	5.25	4824	3.05	3.9	2.41	0.95	0.25
2015254	male	48	65	88.3333	3.54	132	114	26	17	70.8	46.2	3.53	1.31	1.28	1.88	363.8	6.25	77	102.005	38.7	2.63	360.8	2.72	9.9	0.73	0.77	0.16
2015257	female	26	52	76.6667	7.29	115	274	10	16	71.8	39.7	3.91	0.69	1.7	1.59	392.3	4.79	70	103.348	41.7	3.15	778.3	4.41	12.9	2.76	0.87	0.29
2015266	female	26	50	96	6.49	144	236	10	14	72.3	41.6	3.83	0.75			398.8	5.84	98	68.8074	35.2	3.41	1182.7	3.42	8.2	2.77	0.89	0.17
2015268	female	44	69	100.667	10.29	129	200	14	16	72.1	38.6	6.1	3.35	1.07	4.73	552.3	8.54	110	52.7315	37.9	4.08	3313.5	2.4	13	1.05	1.08	0.47
2015269	female	44	47.5	81.6667	7.2	126	318	14	16	73.5	43.3	3.87	1.14	1.52	2	283.8	3.38	68	94.3215	36.6	2.82	240.2	2.71	12.8	1.2	0.8	0.13
2015270	male	47	64	116	6.96	158	172	20	25	70.2	42.5	4.32	3.14	0.95	2.54	546.1	7.76	177	38.5455	34.8	3.17	660.1	3.43	11	1.27	0.82	0.24
2015271	female	26	-	100.667	6.4	134	271	13	16	71.2	41.9	5.53				327.3	4.84	78	90.6744	36.7	3.97	1838.1	2.16	10.1	2.19	1.23	0.23
2015274	male	43	62.5	104.667	6.27	152	228	17	14	71.8	38.7	4.47	1.44	1.17	2.62	340.3	7.22	78	105.092	35.5	3.12	578.2	5	13.2	0.78	0.8	0.18
2015275	female	23	69	86.6667	6.15	128	227	24	22	73	39.3	4.11	0.96	1.19	2.6	306.9	5.42	47	134.12	33.8	3.62	1497.3	4.12	12.4	0.93	1.21	0.24
2015277	female	36	63.9	81.3333	6.37	124	213	8	14	70.1	39.6	3.49	2.68	0.88	1.28	385.5	7.29	90	71.0952	40.5	3.31	708.2	2.87	13.4	2.01	0.79	0.26
2015279	female	27	55	69	5.18	119	176	10	18	74.6	40.4	3.38	0.59	1.4	1.98	238.8	4.62	58	121.687	38.1	2.87	265	3.87	18	2.06	0.51	0.16
2015282	male	42	65.5	90.3333	10.61	101	132	10	18	55.9	33.9	4.37	2.35			657.7	11.62	142	52.1088	28.5	3.47	2197.2	1.48	4.7	1.43	0.81	0.16
2015284	male	24	59	88.6667	6.46	167	356	61	27	73.1	45.1	4.22	2.32			409.8	4.03	85	109.97	36	2.6	410.4	3.33	10.6	1.16	0.87	0.19
2015286	male	20	52	106	5.74	142	171	8	11	70.1	44.8	3.31	0.89	1.24	2.25	335.1	5.32	94	100.146	37.8	2.19	224.7	2.88	10.9	1.17	0.71	0.15
2015289	female	46	69	104	9.43	113	293	40	32	65.7	36.2	4.61	1.96	1.12	3.05	168.3	3.8	57	107.094	39.2	3.35	548	3	12.4	1.24	1.11	0.25
2015291	male	27	-	90	8.95	146	266	9	14	64.7	42.4	3.27	0.67	1.47	1.59	272.4	5.28	74	120.166	35.9	2.56	316.8	3.38	11.8	1.2	0.85	0.27
2015292	male	32	-	94.3333	7.19	95	184	49	32	81.3	45.7	3.14	2.95	1.01	2.28	458.6	7.46	83	106.997	41.4	3.61	216.6	4.97	17.9	1.99	1.14	0.21
2015293	female	31	52	107.333	5.35	104	163	7	15	64.4	37.3	4.51	0.87	1.84	2.37	399.7	6.7	92	71.7058	36	2.88	1473.6	3.05	9.7	2.48	0.75	0.11
2015297	female	19	42.9	73	4.81	108	204	5	11	67.4	39.1	3.44	0.58	1.15	2.06	148.4	4.05	46	138.922	38.3	2.43	376	3.75	14.5	1.33	0.7	0.09
2015298	female	21	57	89.6667	7.01	108	337	9	14	68	39.2	4.26	1.18	1.65	2.18	296.2	5.02	55	129.163	39.7	2.37	550.8	3.79	9.6	1.19	0.89	0.19
2015299	male	22	70	89.3333	9.57	154	332	18	16	67.2	40.5	4.36	2.92	1.35	2.17	305.4	9.09	104	87.3875	42	2.43	457.8	3.7	9.4	0.29	0.84	0.19
2015302	male	26	55	102.333	6.18	135	241	10	15	67.3	41.3	3.75	0.64			422.1	4.99	110	79.3955	43	2.56	1720.4	3.76	12.2	1.07	0.79	0.17
2015303	female	24	49	88.3333	4.8	125	208	7	13	64.9	41.3	2.46	0.62	0.98	1.32	354.1	4.06	60	122.9	37.8	2.39	562.8	3.2	8.4	1.93	0.7	0.15
2015304	female	24	51.5	78.6667	8.86	118	247	9	17	70.1	41.2	3.83	0.86			248	2.86	60	122.9	38.1	3.79	959.4	2.28	13.9	1.3	0.7	0.14
2015306	male	26	74	103	15.2	95	271	15	33	51.6	23.2	3.45	1.26	0.77	2.08	621.2	8.36	179	44.0697	40	5.82	6691.1	2.72	8.1	0.56	0.71	0.23
2015313	female	39	69	122.667	9.79	124	220	10	12	71.5	40.9	5.84	2.16	1.06	3.95	401.6	9.19	140	40.8036	39.1	4.21	3077.4	2.68	11.7	1.35	1.18	0.22
2015315	female	30	49	86.6667	4.37	131	229	7	16	62.6	39.4	4.53	0.91	1.52	2.58	161.2	3.44	59	118.481	45.8	2.43	259	2.74	9.9	1.81	0.83	0.18
2015322	female	28	57	89.3333	10.48	128	340	8	14	71.8	40.9	5.71	1.81			302.3	3.76	53	124.473	36.9	4.36	1194.9	3.7	10.6	2.49	1.08	0.2
2015330	male	21	-	94.6667	6.48	100	155	20	15	55.3	30.9	5.59	1.52	0.83	4.1	185.7	4.18	63	133.909	41.6	5.87	5870	4.44	11.1	2.93	1.09	0.22
2015332	female	36	64	111	7.92	109	300	9	15	66.1	39.2	4.53	5.84	0.9	1.45	420.5	5.77	71	94.6997	37.7	2.72	2098.1	1.6	12.5	2.02	1	0.19
2015338	female	17	46.5	84.6667	4.65	119	229	8	16	63.6	37.9	3.19	0.89	1.27	1.57	395.1	5.86	150	43.8117	36.5	2.95	1624.8	2.67	11.5	1.31	0.85	0.26
2015342	female	28	58	76	8.85	106	269	21	23	66.5	37	5.25	1.06	0.93	2.93	306.2	3.71	59	120.158	36.8	3.24	491	4.08	12.3	1.48	1.08	0.29
2015352	female	34	40	94.3333	7.33	129	279	11	17	72.5	39.9	3.32	0.92			165.4	4.15	57	116.513	37.2	2.87	930.6	3.29	13.7	1.52	0.78	0.15
2015355	female	30	50	100.333	5.71	148	232	8	15	74.5	38.6	3.57				436.4	4.63	71	98.7763	36.2	3.4	624.8	3.58	13.2	1.54	0.87	0.28
2015357	female	27	52.7	121	9.85	103	268	13	15	57	31.2	4.96	1.6	1.12	2.83	442.4	6.76	184	31.9015	40.6	4.05	4226.4	2.09	8.3	2.06	0.94	0.25
2015360	male	27	66.6	85	4.75	135	151	15	16	67	43.3	4.55	2.69			435.6	7.38	140	58.9006	40.1	2.26	297.9	2.56	7.3	0.59	0.73	0.23
2015361	female	40	56	89.6667	7.72	113	110	12	9	61.6	35.8	4.11	1.87	2.28	2.39	341.4	6.02	91	68.2081	34.4	2.89	1100.8	1.87	7.4	1.11	0.83	0.26
2015363	female	22	55	89.6667	4.56	111	296	27	24	71.9	43.9	4.79				249	3.96	62	123.302	34.8	3.74		3.18	8.7	0.78	0.99	0.15
2015364	female	48	70	95.3333	7.24	101	179	22	13	71.3	41.7	4.95				421.7	6	109	51.8397	34.9	2.9	564.4	3.41	12.3	2.08	1.05	0.27
2015365	male	15	49	90.3333	4.76	98	283	18	31	61	34.8	3.3				420.9	5.01	49	154.872	41.9	3.29	1095.8	3.76	8.9	1.55	0.97	0.21
2015366	male	32	62.6	90	6.87	128	242	12	18	61.1	33.3	4.11	1.28			298.2	6.6	129	62.7816	35.9	3.06	2490	3.24	10.9	0.75	0.77	0.2
2015369	female	26	52	86.6667	7.35	130	217	11	17	67.4	42.2	3.56	1.17			222.8	3.86	70	103.348	32.4	3.08	1550	2.11	8.1	0.48	0.78	0.21
2015378	male	17	60.6	98.6667	7.21	156	265	12	24	72.3	46.1	2.86	1.07	1.05	1.75	407.1	4.73	62	138.634	42.1	2.52	389.5	4.96	9.4	0.97	0.83	0.21
2015381	male	28	67	77	5.2	120	277	10	17	58	33.9	4.1	1.43	1.03	2.43	592	9.11	122	69.0763	37.1	3.27	5536.1	2.99	7.8	0.99	0.93	0.24
2015390	male	21	63	99.3333	6.72	150	249	17	25	70.1	41.3	4.44	1.06	1.38	2.51	390.7	4.48	97	95.7384	33.7	3.45	1201.2	3.07	8.3	0.87	0.95	0.26
2015397	female	50	53	105	7.15	116	176	14	16	71.2	41.1	4.9	8.13	0.81	1.46	371.1	5.33	80	74.2974	33.8	4.42	500.5	3.35	11.1	2.05	1	0.22
2015401	male	32	72	101.667	7.38	140	315	27	32	69	45.5	5.34	3.53	1.13	3.69	369.4	7.68	81	110.199	37.2	3.58	1057.8	4.84	9.7	0.78	1.28	0.27
2015402	male	25	65	101	8.44	159	284	10	15	80.3	48.2	4.48	1.26	1.13	2.82	482.6	3.12	77	119.891	40.2	3.81	130.9
2015407	male	43	73	87	7.06	159	148	19	20	73	45.1	4.37	2	1.18	2.46	566.3	6.17	138	53.5628	35.7	3.25	441	4.28	11	1.21	0.71	0.19
2015408	female	20	62.5	99	6.13	107	189	11	14	52.7	26.5	4.95	2.63	1.18	2.99	335.7	3.63	48	136.031	32.4	5.3		2.29	4	0.86	1.01	0.25
2015409	female	45	53	110.333	7.07	114	302	11	17	55.1	27.3	6.51	2.28	2.51	3.95	371.6	5.43	101	58.0548	30.7	5.41	5090.5
2015416	female	15	91.5	98.3333	6.54	163	453	18	28	55.9	15.4	12.07	3.05	1.19	9.23	506.6	3.84	66	119.883	34.8	10.2	>6000	3.91	3.8	2.58	1.56	0.52
2015418	male	29	106	98.6667	7.45	160	222	18	16	75.2	44	4.93	1.89	1.43	3.65	606.7	6.91	145	55.6664	37.8	3.21	1632.5	3.2	7.6	0.88	0.91	0.25
2015420	female	35	48.4	93.6667	7.8	144	205	33	22	79.1	48.1	5.01	0.75	1.38	3.36	190.7	5.89	41	128.944	38.1	3.29	522.7	3.04	13.2	1.81	1	0.27
2015424	male	55	58	106.667	5.51	114	128	29	49	66.1	32.6	3.13	0.96	0.78	2	369.9	6.55	63	105.459	37.9	3.06	2834.4	5.21	12.2	2.3	0.96	0.13
2015431	female	23	54.2	88.3333	7.75	108	180	14	16	63.6	39.3	2.93	1.25	1.97	1.08	216.3	4.71	63	119.888	36.2	2.77	976.6	2.59	7.9	1.51	0.78	0.13
2015435	male	40	70	89.3333	6.44	150	209	18	14	71.8	40.8	3.84	1.84	0.92	2.56	356.7	4.98	80	106.22	32.8	2.87	451.4	3.23	14.1	1.42	0.78	0.15
2015437	female	20	60	92.6667	8.55	147	309	14	19	85.1	52.1	6.23	2.68			456.6	4.99	80	91.7267	41.8	3.43	1178.6	3.24	10.6	1.67	1.34	0.25
2015439	female	40	72.8	95	7.82	144	203	15	16	73.1	43.7	4.63	3.69	4.63	3.69	282.9	5.3	74	87.5821	34.8	2.62	979.2	2.15	10.6	2.98	0.99	0.23
2015441	male	28	64.7	106.667	10.68	164	296	44	18	35.9	23.3	4.41	1.09			372.6	8.77	92	97.1669	31.3	2.64	675
2015448	female	37	51	76.6667	10.08	123	186	16	16	58.5	36.3	4.95	1.14			251.9	4.89	67	100.866	38.4	3.68	1771.9	1.31	5.7	1.43	0.62	0.19
2015458	female	47	56	88.3333	7.75	119	244	16	18	69.9	40.5	4.45	0.87			299	4.63	78	78.2382	32	3.7	368	2.16	12.2	1.3	0.93	0.22
2015461	female	40	50	101.667	6.15	134	148	23	19	70.2	42.9	4.69	0.84	1.66	2.82	197	5.8	80	79.7042	37	2.93	421.8	2.9	11.2	1.8	0.62	0.17
2015463	female	22	53	83.3333	7.24	126	288	22	22	64.1	38.8	3.56	1.17	1.33	1.83	228.4	3.25	39	143.617	37	3.62	721.6	3.21	8.7	2.34	1.07	0.22
2015464	male	30	63	92.3333	6.82	147	201	6	13	63.1	40.1	5.54	2.58			401.9	5.98	89	99.7296	34	3.31	1123.2	1.58	9.9	1.07	1	0.27
2015469	female	40	55	122	9.12	85	422	15	16	66	37.3	4.41	0.94			374.8	7.34	103	58.7214	43.8	3.63	1430	3.22	9.3	3.66	1.14	0.28
2015471	female	30	52	88.3333	6.95	123	265	15	19	62.2	36.5	7.47	2.25	1.55	5.09	380	3.2	53	122.736	37.9	3.86	2541.6	1.63	7.5	1.74	1.05	0.2
2015473	female	31	45	87	9.23	119	312	《5	9	77	41	3.13	0.92			241.1	3.19	51	123.429	38.7	2.12	336	6.56	16.6	3.95	0.67	0.14
2015476	male	27	67	114.667	8.5	88	449	7	15	80.5	35.4	2.67	0.82			297.2	10.05	446	14.5125	47	5.51	561	7.12	17.3	0.6	1.28	0.24
2016003	male	24	83	106.667	7.61	169	259	22	14	84.2	47.8	3.7	2.03	0.97	2.16	450.3	4.28	49	145.384	37.3	3.74	636	4.14	16	1.57	1.14	0.23
2016004	female	29	48.2	87	5.98	115	374	11	15	78.3	43.9	4.16	0.78	1.23	2.9	227.7	4.25	61	118.015	40.5	4.16	408.6	1.65	13.7	2.02	0.82	0.2
2016008	male	28	68	97.3333	6	146	277	13	17	68.3	44.5	4.45	1.05	0.83	3.39	441.4	6.04	136	60.5745	34.3	2.92	530.6	2.47	8.5	0.99	0.87	0.17
2016009	female	27	52	74	6.16	132	224	8	16	62.3	35.9	4.89	0.63	1.61	2.85	382.9	5.27	78	90.0397	39.6	3.38	616
2016014	male	34	75	79.6667	10.3	185	261	54	37	54.5	21.3	8.49	2.58	2.27	5.32	494.6	4.23	90	95.6653	40.4	9.21	7473.7	2.97	5.6	0.81	1.56	0.37
2016031	male	46	70	84.3333	6.99	126	192	33	23	70	43.6	4.49	1.63	1.12	2.78	331.1	4.29	97	80.3189	48.2	3.66	447.3	1.76	10.5	1.4	0.81	0.22
2016035	male	33	64	94.3333	11.77	132	216	10	17	64.5	33.4	3.19	1.09			267.2	6.35	69	118.567	34.7	5.72	3183	1.88	8.2	1.52	1.05	0.17
2016041	male	42	74	92.3333	5.09	132	210	10	15	64.1	43.4	3.78	1.03	1.47	1.76	284	4.79	82	101.211	37.1	2.18	162	2.36	8.6	0.55	0.7	0.2
2016042	female	30	51	92.3333	6.59	122	241	11	20	64.7	36.7	4.4	0.99			234.1	4.11	73	95.514	40.3	3.28	2281.9	2.49	9.9	1.52	0.77	0.15
2016043	female	36	52	78.3333	6.08	128	395	18	19	67.6	38.4	5.69	1.48	1.29	4	278.4	3.9	60	112.965	41.4	4.03	1215.5	2.65	8.4	1.42	0.76	0.19
2016044	male	34	51	73.6667	3.87	131	221	16	19	73.2	47.5	4.93	0.86	1.24	3.48	275	8.1	76	113.153	41.9	2.69	302.4				0.63	0.18
2016045	male	33	71	97.3333	7.61	121	252	27	29	73.4	45.1	4.02	2.06	0.78	2.45	430	9.1	133	60.0825	38.2	3.28	756	3.06	11.4	1.03	1.15	0.2
2016047	female	23	50	86.3333	6.94	127	226	7	17	66.5	40.6	3.25				237.1	4.1	75	97.1025	40.6	3.22	201.6	3.79	9.8	1.06	0.58	0.15
2016050	female	60	70	109	4.42	117	252	9	14	59.9	31.4	8.49	2.93	1.61	5.71	312	6.7	123	41.1724	40.7	4.24	8114.7	4.41	6.2	0.88	1.04	0.17
2016052	male	36	75	94	14.52	141	271	18	13	67.4	40.5	3.8	2.14	0.84	2.25	494.7	5.14	108	75.6698	36.8	2.74	446.4
2016055	female	39	59	89	4.33	109	262	12	12	66.3	37	4.65	1.26	0.92	3.11	362.3	4.93	85	74.5933	35.6	4.51	690
2016056	female	26	59.1	88	7.84	133	307	12	16	83.6	51.4	4.52				236.7	4.51	53	126.234	39.2	2.68	227.7	3.95	13.8	2	0.88	0.23
2016057	male	23	74	92	6.16	132	211	17	16	60	40.2	2.83	1.28	0.95	1.46	321	5.3	97	94.4028	38.3	2.66	241.5	2.97	7.6	0.48	0.81	0.19
2016058	female	27	70	90	4.68	123	183	14	18	62.7	32.7	3.69	1.72	1.03	2.83	428.7	5.91	113	57.5181	39	5.18	1714.8	2.08	9.7	1.53	1.1	0.27
2016060	female	30	57	92.3333	3.86	104	207	7	16	72.3	39.7	4.37	1.12	1.17	2.75	247.8	3.97	57	119.833	41.6	2.84	466.2	3.24	12.4	5.94	0.7	0.2
2016062	male	38	72	108.333	8.46	153	164	31	25	73.4	45.3	5.45	4.4	0.99	2.55	493.8	6.13	97	84.9618	36.9	2.85	125.1	3.26	12.2	1.26	1	0.27
2016063	female	54	68	127.667	7.62	141	322	25	25	74.1	41.4	5.81	1.95			352.6	8.76	70	84.8951	36.2	3.43	754	3.26	15.1	1.54	0.96	0.2
2016065	male	27	-	101.667	6.79	143	203	14	12	64.7	42	7.23				392	5.5	133	62.6689	32.8	2.93	3052.8	1.95	7.1	0.43	0.91	0.24
2016066	female	39	54	92.3333	4.36	118	123	17	25	70.6	41.7	4.15	4.156	0.96	2.26	215.6	4.69	91	68.6889	32.9	2.7	501.6	2.5	11.6	1.84	0.72	0.18
2016070	male	38	78	98.3333	5.77	146	187	12	10	64.3	37.9	3.74	1.04			388.6	5.75	82	104.095	31.6	2.9		2.05	11	0.72	0.95	0.19
2016072	female	28	55.5	100	7.34	106	286	10	18	68.4	35.1	5.82	3	1.19	3.76	442.3	9.08	129	48.6657	33.5	4.62	4813.2	3.68	10.3	0.61	1.2	0.23
2016074	male	47	62.5	115.333	6.65	151	317	27	26	72.5	46.5	6.85	2.73			449	6.7	132	54.9541	36.5	3.66	1366.1	3.3	10.3	1.27	1.13	0.3
2016079	female	29	-	93	5.25	106	178	6	12	71.5	35.7	3.5				203	3.6	78	88.7836	35.2	3.77	360	3.36	16.1	3.19	0.79	0.28
2016081	male	40	64	91.3333	5.32	167	212	24	25	79.4	45.5	4.88	1.48	1.21	3.1	359.1	4.4	74	109.678	38	3.22	677.6	4.48	14.1	0.96	0.82	0.19
2016088	female	30	54.5	100.667	6.04	133	258	10	19	56.4	33.5	6.49	1.25			159.4	3.77	55	121.25	36.9	4.07		1.26	4.9	1.08	0.6	0.17
2016091	female	41	58	91.6667	7.61	127	192	20	18	74	44	4.62	1.22	1.35	2.83	256.7	4.54	65	101.731	37	3.11	566.8
2016093	male	54	60	112	12.3	111	419	11	17	62.6	33.4	5.4	2.15	0.94	3.81	588	11.8	208	30.1912	42.5	4.5	2222	3.71	13.4	1.13	0.68	0.31
2016095	female	38	80	108.333	9.33	131	255	19	30	65.2	39.4	4.76	3.15	1.01	3.07	311.3	5.25	70	94.9937	32	2.61	696
2016096	male	25	70	81	8.47	149	368	7	14	72.2	41	3.01	0.97	0.92	2.02	292.4	4.02	67	126.946	41	2.85	342	3.21	12	0.59	0.9	0.16
2016097	female	41	60	84	7.62	122	180	15	19	69.4	41.8	3.48	2.72	1.48	1.5	359	4.85	104	57.6332	39.7	2.75	278.9	2.02	12.2	2.79	0.79	0.18
2016098	female	29	37.7	97.3333	4.59	86	162	8	18	75.6	42.1	4.02	0.87			347.6	8.49	149	40.5969	41.6	2.43		3.34	12.4	2.34	0.65	0.16
2016099	male	53	-	106.667	4.58	109	224	6	18	63.7	35.2	4.78	1.11	1.38	2.81	388	8.3	213	29.5433	38.6	3.77	1711.3	2.95	13.1	1.44	0.59	0.22
2016105	female	47	-	101.667	7.61	134	142	19	17	78.7	43.3	4.59	1.51	1.16	2.99	299	5.1	53	108.921	37.5	2.95	191.4				1.08	0.17
2016107	female	24	53	87.3333	7.15	132	292	7	14	68	41.1	4.67	0.87	1.65	2.82	357	4.7	77	93.4031	39.2	2.87	906.5	2.39	11.6	1.07	0.84	0.13
2016108	male	47	94	116	8.65	146	224	43	30	68.3	40.9	3.7	6.15	0.8	1.3	817	8.7	155	45.2546	28.1	3.27	812	1.44	11.2	0.6	0.56	0.26
2016117	female	49	52	93	6.21	131	184	55	36	55.1	26.4	9.77	4.85	1.72	5.98	365	6.1	85	69.5332	37.4	7.16	136.2	1.87	5.3	1.43	1.51	0.32
2016120	female	58	57	79.6667	5.12	112	166	11	15	67.4	40.7	4.66	1.17	1.38	2.99	399.8	11.55	91	60.1066	33.8	3.8	228
2016121	female	27	54	98.3333	10.24	129	269	15	12	58.2	35.2	4.58	1.47	1.99	2.07	208.6	3.38	82	84.757	33.6	2.71	956	4.35	7.8	1.3	0.85	0.24
2016125	male	39	59	97.3333	5.66	120	114	19	18	68.1	40.9	4.24	1.77	1.18	2.43	471	7.85	99	82.3108	40	2.84	544.5	2.53	12.4	2.13	0.81	0.18
2016129	female	28	-	78.6667	7.33	118	340	19	22	67.1	42.2	3.68	2.1	1.08	2.13	234	4.1	66	109.42	41.1	2.76	638.4	2.27	10.1	0.85	0.85	0.24
2016131	female	35	58	83.6667	8.33	133	290					6.3	2.03	1.34	4.35	311	3.6	65	106.11	37	3.55	516.8				0.97	0.26
2016133	female	47	58	80.3333	4.52	119	174	24	20	65.7	37.9	4.03	0.68	1.34	2.4	291.1	4.66	78	78.2382	36.7	3.1	283.2	2.33	12.6	1.12	1.09	0.23
2016135	female	29	51	90	7.23	124	200	8	15	79.1	48.8	4.65	0.91	1.59	2.82	213.7	6.78	71	99.4726	39.1	3.14	172.8	2.35	12.4	3.37	0.8	0.16
2016136	female	54	69	91	7.51	120	170	17	15	67.6	40.1	5.03				272.4	6.08	56	101.833	35.5	3.68	1287.9	4.23	10.6	1.12	1.2	0.14
2016138	female	24	46	86.6667	6.44	116	239	10	13	65.9	39.5	4.16	0.58	1.68	2.22	294.8	5.48	63	119.049	39.4	3.9	1060.3	2.65	12.4	1.24	1	0.2
2016140	male	51	61	101	6.49	140	287	17	18	71.5	47.2	3.84	1.25	0.97	2.43	248	5.3	76	100.416	34.9	3.04	1258.3	2.17	11.5	0.44	0.99	0.19
2016141	female	24	60	80.6667	6.77	146	269	27	24	72.1	43.6	4.89	1.31			256	4.2	59	123.582	42.6	2.87	767.6	4.94	9.9	1.02	1.02	0.19
2016144	female	28	73	106.667	7.53	142	168	12	30	74.6	35.1	4.46	1.42	1.15	2.9	625.2	6.74	101	65.4186	36.5	6.3	434.4	3.11	10.8	1.87	1.44	0.33
2016149	female	28	47	74.3333	9.38	122	351	15	15	59.9	36.1	4.9	1.37	1.78	1.78	207.3	3.35	56	122.238	31.9	3.07	1171.5
2016157	female	32	62	80	6.18	137	245	14	17	73.9	44.6	3.64	1.74	1.05	1.99	227.3	3.41	49	124.189	41	3.48	153.9	3.54	14.6	1.11	1.51	0.29
2016159	male	33	80	140.333	6.69	157	226	21	13	73.1	42.6	4.97	1.39	1.04	3.15	502.3	5.42	85	103.233	41.7	3.22	768.6
2016171	female	57	66	89.3333	4.84	129	168	21	18	65.2	35.8	4.92	1.87	1.2	2.91	380.1	7.94	58	98.5648	37.2	4.05	1217	1.61	9.3	0.56	1.07	0.22
2016172	female	39	53	66.6667	6.24	143	176	22	26	75.1	31.6	5.67	1.07	1.7	3.68	288.6	3.82	61	110.009	38	3.18	135	3.46	11.5	1.16	0.86	0.22
2016175	male	44	71	112.333	7.99	131	201	13	12	75.1	43.6	5.25	2.77	0.92	3.1	509.6	7.27	151	47.7027	41.1	5.36	3183.4	2.18	11.1	0.74	1.2	0.33
2016179	male	59	77	95.6667	3.19	110	99	23	13	69.2	39.2	4.26	2.53	0.89	2.21	511.5	9.71	165	38.568	35.9	4.38	1371.3	3.98	6.3	0.53	1.13	0.22
2016182	female	43	53.5	84.6667	6.06	126	156	15	21	65.9	41	3.58	1.5	1.25	1.85	236.3	4.79	76	83.0349	38.5	2.51	300.9	2.49	11.3	0.71	0.86	0.22
2016186	female	49	55	97	10.46	138	327	49	50	76.5	41.9	4.8	1.95	0.97	3.14	311.9	2.38	72	84.9855	36.7	0.56	1181.8	1.97	10.9	0.6	1.43	0.24
2016188	female	44	55	72.3333	5.1	109	215	12	18	74.5	40.9	5.02	0.86	1.38	3.39	218.4	3.94	51	112.657	38.3	3.63	279	3.24	11.7	1.26	0.94	0.2
2016191	male	57	77	92.6667	7.46	166	152	38	30	67.7	44	4.26	2.16	0.89	2.74	330	7.8	125	54.7145	36.2	2.71	2038.5	3.94	10.4	0.95	0.76	0.16
2016193	male	39	64	88.3333	7.68	144	107	44	29	71.2	44.3	4.05	1.76	0.91	2.62	558	7.3	108	74.0919	36.1	3.28	480.9	3.81	12.9	1.43	0.73	0.26
2016198	male	22	59	88.3333	8.07	135	278	8	16	73.6	46.3	3.55	1.98	1.51	1.59	365	3.7	81	118.218	33.9	2.56	526.3	2.24	12.5	0.71	0.88	0.18
