# Supplementary material for: Serum uric acid level is correlated with the clinical, pathological progression and prognosis of IgA nephropathy: an observational retrospective pilot-study
Source: PeerJ. 2020 Nov 3;8:e10130. doi: 10.7717/peerj.10130 (PMC7646298; doi:10.7717/peerj.10130)
Supplement: Supplemental Information 2 [file peerj-08-10130-s002.xlsx]

## Sheet: Sheet1
Specimen No.	IgA score	C3 score	IgG score	IgM score	FRA score	Glomeruli number	Crescents number	Large rescents number	Small rescents number	Cellular crescents number	Fibrocellular crescents number	Fibrous crescents number	Glomerular sclerosis number	Arteriosclerosis score	Hyalinosis score	M score	E score	S score	T score	C score
2015002	2	1	0	1	1	22	0	0	0	0	0	0	1	1	0	0	1	0	0	0
2015008	2	0	0	0	0	12	0	0	0	0	0	0	1	2	1	0	0	1	2	0
2015009	2	1	0	0	0	23	0	0	0	0	0	0	8	1	0	0	0	0	0	0
2015010	2	1	0	0	0	29	4	0	4	4	0	0	0	0	0	0	0	0	0	1
2015015	3	2	2	0	0	22	0	0	0	0	0	0	1	0	1	0	0	0	1	0
2015016	2	0	0	1	1	8	0	0	0	0	0	0	0	0	0	0	0	0	0	0
2015018	2	0	0	0	0	8	1	0	1	0	1	0	4	2	2	0	0	0	2	1
2015019	3	1	2	0	1	14	2	1	1	2	0	0	3	0	0	0	0	1	1	1
2015020	3	1	0	0	0	12	4	1	3	3	1	0	0	1	0	0	1	0	2	2
2015022	2	1	0	0	0	18	0	0	0	0	0	0	0	1	0	0	0	0	0	0
2015036	3	2	0	0	1	16	1	0	1	1	0	0	1	0	0	0	0	0	0	1
2015038	2	1	1	0	0	18	0	0	0	0	0	0	1	0	0	0	0	1	1	0
2015040	4	2	1	1	1	14	0	0	0	0	0	0	3	2	1	0	1	0	1	0
2015043	3	1	0	0	1	37	1	1	0	1	0	0	5	2	2	0	0	0	2	1
2015046	3	2	0	0	1	14	0	0	0	0	0	0	1	0	1	0	0	1	0	0
2015056	3	1	0	1	0	14	0	0	0	0	0	0	0	0	0	0	0	0	0	0
2015058	2	1	0	1	1	9	2	1	1	0	1	1	1	1	0	0	0	0	1	1
2015059	2	2	0	0	0	19	0	0	0	0	0	0	2	0	0	0	0	0	0	0
2015061	3	0	1	0	0	19	1	0	1	1	0	0	6	0	1	0	0	1	1	1
2015063	2	3	0	0	0	16	0	0	0	0	0	0	8	2	2	0	0	0	1	0
2015067	3	2	0	0	0	17	1	0	1	1	0	0	6	1	1	0	0	0	1	1
2015069	3	1	0	1	0	13	6	1	5	1	1	4	1	2	2	0	1	1	2	2
2015073	3	1	1	1	0	8	1	0	1	1	0	0	0	0	0	0	0	1	1	1
2015075	3	2	0	1	0	25	6	1	5	3	2	1	5	2	2	0	1	1	2	1
2015083	2	1	0	0	0	18	6	1	5	5	1	0	4	1	1	0	0	1	1	2
2015084	3	2	0	1	0	14	3	1	2	3	0	0	0	0	0	0	0	0	0	1
2015085	4	1	0	0	1	10	4	0	4	0	4	0	0	0	0	0	0	0	0	2
2015087	3	3	0	1	0	8	0	0	0	0	0	0	1	1	2	1	0	0	0	0
2015090	2	2	0	0	0	17	1	1	0	0	1	0	3	1	1	0	1	0	2	1
2015100	2	1	0	0	1	26	2	0	2	2	0	0	2	0	0	0	0	1	0	1
2015108	3	1	0	0	0	12	0	0	0	0	0	0	2	0	0	0	1	0	0	0
2015109	2	1	0	1	1	11	0	0	0	0	0	0	0	0	0	1	1	0	0	0
2015110	3	1	0	0	1	16	0	0	0	0	0	0	0	1	1	0	0	0	1	0
2015112	3	1	0	0	0	26	1	0	1	0	1	0	0	2	2	1	0	0	0	1
2015116	3	2	0	0	0	32	1	0	1	1	0	0	4	0	0	0	0	0	0	1
2015120	2	1	0	1	0	22	6	6	0	0	1	5	9	0	2	1	1	1	2	2
2015122	3	1	0	1	0	24	1	1	0	0	1	0	2	1	0	1	1	0	0	1
2015128	2	0	0	1	1	10	2	0	2	0	0	2	1	0	1	0	1	0	2	1
2015132	3	1	0	0	0	21	0	0	0	0	0	0	0	0	0	0	0	0	0	0
2015133	3	1	0	0	1	14	0	0	0	0	0	0	0	0	0	0	0	1	1	0
2015134	2	0	0	0	0	16	0	0	0	0	0	0	7	0	2	0	0	1	1	0
2015135	3	2	0	1	0	21	3	1	2	0	2	1	1	2	0	1	0	1	0	1
2015136	2	1	0	0	1	16	0	0	0	0	0	0	4	1	1	0	1	0	0	0
2015139	3	1	0	1	1	13	1	1	0	0	0	1	2	2	1	1	0	0	0	1
2015142	3	2	0	0	1	30	0	0	0	0	0	0	3	1	1	0	0	0	0	0
2015144	2	1	1	0	0	13	3	0	3	0	3	0	4	0	1	1	0	1	2	1
2015145	2	1	0	1	1	15	3	1	2	0	3	0	3	0	0	0	0	0	0	1
2015149	2	2	0	1	1	13	0	0	0	0	0	0	6	1	2	1	0	0	2	0
2015150	2	2	0	2	0	35	4	2	2	1	2	1	7	0	1	1	0	1	1	1
2015152	2	2	0	0	1	13	0	0	0	0	0	0	1	1	1	1	0	0	0	0
2015153	2	0	0	0	0	19	0	0	0	0	0	0	1	0	0	0	1	0	0	0
2015159	2	2	0	0	0	20	0	0	0	0	0	0	12	1	2	0	0	1	2	0
2015162	3	1	0	0	0	14	0	0	0	0	0	0	4	1	2	0	0	0	2	0
2015168	2	0	0	0	1	13	0	0	0	0	0	0	0	0	0	0	0	0	1	0
2015173	2	2	0	1	1	14	2	2	0	0	2	0	3	2	2	1	0	1	1	1
2015177	3	2	0	2	0	9	3	2	1	0	1	2	5	1	2	1	1	1	2	2
2015183	2	1	1	0	0	19	3	2	1	1	1	1	0	0	1	0	0	0	0	1
2015186	2	1	0	1	1	19	1	0	1	0	1	0	0	0	0	0	0	1	0	1
2015192	3	2	2	3	0	16	1	0	1	1	0	0	2	0	0	0	0	0	0	1
2015193	4	3	0	0	1	27	3	0	3	0	3	0	2	1	1	0	0	0	1	1
2015199	3	2	0	1	0	13	5	3	2	1	3	1	5	0	1	1	0	0	2	2
2015200	2	2	0	1	0	23	11	3	8	2	8	1	0	0	0	0	0	1	2	2
2015202	3	2	0	1	0	22	2	1	1	1	0	1	0	0	1	0	0	1	2	1
2015211	2	2	0	0	0	32	0	0	0	0	0	0	17	2	2	0	0	1	1	0
2015214	2	1	0	0	0	27	0	0	0	0	0	0	1	1	0	0	0	0	1	0
2015217	2	2	0	1	0	19	0	0	0	0	0	0	11	1	2	1	0	1	2	0
2015225	3	2	0	1	1	19	0	0	0	0	0	0	0	0	0	1	0	1	0	0
2015228	3	2	1	1	1	20	0	0	0	0	0	0	0	0	1	0	1	0	0	0
2015240	3	2	0	1	0	23	1	1	0	0	1	0	6	0	0	0	0	0	1	1
2015242	2	1	0	1	1	22	0	0	0	0	0	0	0	0	0	0	1	1	0	0
2015246	3	1	0	1	0	14	1	0	1	0	0	1	0	0	0	0	1	0	0	1
2015249	3	2	0	0	1	11	0	0	0	0	0	0	0	1	1	0	0	1	1	0
2015250	2	2	0	3	1	16	1	1	0	0	0	1	7	0	0	0	0	1	1	1
2015254	2	0	0	1	1	26	1	1	0	0	0	1	0	1	1	0	0	0	0	1
2015257	2	1	1	1	0	13	0	0	0	0	0	0	1	0	0	0	0	0	0	0
2015266	3	1	0	1	0	13	0	0	0	0	0	0	7	0	1	1	1	1	2	0
2015268	3	0	0	0	0	10	5	4	1	0	1	4	1	0	0	0	1	0	2	2
2015269	3	2	0	0	0	33	1	0	1	0	0	1	10	1	0	0	0	0	1	1
2015270	2	1	0	2	0	9	0	0	0	0	0	0	0	0	2	0	0	0	1	0
2015271	3	0	0	1	0	19	2	0	2	2	0	0	3	0	0	1	0	1	2	1
2015274	2	1	0	1	0	13	2	2	0	0	0	2	2	0	0	0	0	1	0	1
2015275	3	1	1	0	1	9	0	0	0	0	0	0	1	1	0	1	0	0	0	0
2015277	3	2	0	1	1	19	1	1	0	0	0	1	8	1	2	1	0	1	1	1
2015279	2	1	0	0	1	14	0	0	0	0	0	0	1	0	0	0	1	0	0	0
2015282	3	1	1	1	0	12	0	0	0	0	0	0	0	2	2	2	1	1	1	0
2015284	2	1	1	0	1	34	4	0	4	0	4	0	1	0	1	0	1	1	0	1
2015286	2	2	0	0	0	20	0	0	0	0	0	0	4	0	0	0	1	0	0	0
2015289	2	1	0	0	0	10	0	0	0	0	0	0	1	2	0	0	0	0	0	0
2015291	3	2	1	1	1	24	0	0	0	0	0	0	2	0	0	0	0	0	0	0
2015292	3	0	0	1	0	16	0	0	0	0	0	0	3	2	2	0	1	0	1	0
2015293	3	2	2	0	0	28	1	1	0	0	0	1	12	2	0	1	0	1	2	1
2015297	3	2	0	2	1	26	0	0	0	0	0	0	0	2	0	0	0	0	0	0
2015298	3	2	0	1	0	13	0	0	0	0	0	0	0	0	1	0	1	0	0	0
2015299	3	2	0	0	0	24	0	0	0	0	0	0	2	2	2	1	1	1	1	0
2015302	3	2	0	0	2	20	3	0	3	0	1	2	0	1	1	0	0	0	0	1
2015303	2	3	0	1	0	23	2	1	1	0	1	1	1	2	1	0	1	0	0	1
2015304	2	2	0	0	0	12	2	0	2	0	2	0	0	0	1	0	0	0	0	1
2015306	3	0	0	0	1	13	5	1	4	0	3	2	1	2	2	1	0	0	2	2
2015313	2	2	0	0	1	8	0	0	0	0	0	0	4	0	2	0	0	0	2	0
2015315	3	1	0	1	1	15	0	0	0	0	0	0	1	0	2	0	0	0	1	0
2015322	3	2	0	1	0	31	7	2	5	0	2	5	0	1	0	0	1	1	2	1
2015330	2	1	0	0	2	18	0	0	0	0	0	0	0	1	0	0	0	0	0	0
2015332	3	2	0	1	0	18	1	0	1	0	1	0	7	2	2	0	0	0	2	1
2015338	2	3	0	0	0	21	0	0	0	0	0	0	11	2	2	1	1	1	2	0
2015342	2	0	0	0	0	24	3	0	3	0	1	2	0	1	0	0	0	0	0	1
2015352	3	2	1	1	0	21	0	0	0	0	0	0	0	1	2	1	1	0	0	0
2015355	3	2	0	1	0	17	0	0	0	0	0	0	1	1	2	1	0	1	2	0
2015357	3	2	1	2	0	9	2	0	2	0	2	0	5	1	1	1	0	0	2	1
2015360	3	2	0	1	0	19	4	4	0	1	1	2	5	0	2	1	0	0	2	1
2015361	3	1	0	1	1	22	2	1	1	2	0	0	9	1	2	0	0	0	2	1
2015363	3	2	1	1	0	26	1	1	0	0	0	1	1	0	0	1	1	1	1	1
2015364	2	0	0	0	0	14	0	0	0	0	0	0	1	1	2	0	0	1	1	0
2015365	3	1	0	1	0	21	1	0	1	0	0	1	0	0	0	0	0	0	0	1
2015366	2	2	0	1	0	23	5	4	1	1	1	3	12	0	2	1	0	1	2	1
2015369	3	1	0	0	0	11	1	0	1	0	0	1	0	0	0	0	0	0	0	1
2015378	2	1	0	0	1	23	1	1	0	1	0	0	0	0	0	0	0	0	0	1
2015381	3	2	0	1	0	31	3	2	1	0	0	3	10	1	2	0	0	0	1	1
2015390	3	1	1	0	0	9	0	0	0	0	0	0	0	1	0	1	1	1	0	0
2015397	2	1	0	0	1	13	1	0	1	0	1	0	3	1	0	0	0	0	0	1
2015401	3	1	0	0	1	40	0	0	0	0	0	0	3	2	2	0	1	1	2	0
2015402	3	2	0	0	1	20	0	0	0	0	0	0	0	1	0	0	1	0	0	0
2015407	2	1	0	0	0	12	1	1	0	0	0	1	2	0	1	0	0	0	0	1
2015408	3	2	0	1	0	9	0	0	0	0	0	0	0	0	0	1	1	0	1	0
2015409	2	2	0	1	0	17	7	6	1	0	1	6	9	0	1	1	0	0	2	2
2015416	3	0	0	0	0	20	0	0	0	0	0	0	0	0	1	0	1	0	0	0
2015418	4	2	1	1	1	12	1	0	1	0	1	0	4	1	2	1	1	1	2	1
2015420	3	1	0	1	1	21	3	2	1	0	2	1	3	0	0	1	1	0	1	1
2015424	3	3	0	1	1	13	1	0	1	1	0	0	1	0	0	1	0	0	0	1
2015431	2	2	0	1	0	26	6	2	4	0	2	4	1	0	1	1	0	1	1	1
2015435	2	1	0	0	0	11	0	0	0	0	0	0	0	0	1	0	0	0	0	0
2015437	3	1	0	1	0	11	0	0	0	0	0	0	3	0	2	0	1	0	2	0
2015439	2	1	0	0	0	19	0	0	0	0	0	0	2	0	1	0	0	0	1	0
2015441	3	2	0	0	0	11	2	2	0	0	0	2	4	0	2	1	0	0	2	1
2015448	3	2	3	1	0	26	1	1	0	0	0	1	0	2	1	1	1	1	0	1
2015458	3	2	0	1	0	14	2	0	2	0	2	0	0	0	0	1	0	0	0	1
2015461	4	2	0	1	1	8	0	0	0	0	0	0	1	0	0	1	0	0	0	0
2015463	3	2	1	1	0	16	0	0	0	0	0	0	1	0	0	0	0	0	0	0
2015464	3	2	0	2	0	15	1	1	0	0	0	1	5	0	0	1	1	0	1	1
2015469	3	1	0	1	0	15	2	2	0	0	0	2	2	1	1	0	0	0	0	1
2015471	2	2	0	1	1	17	5	0	5	1	4	0	0	0	0	1	1	1	0	2
2015473	2	2	0	1	0	15	0	0	0	0	0	0	3	0	2	0	0	0	2	0
2015476	2	2	0	0	0	22	0	0	0	0	0	0	4	0	0	0	0	0	2	0
2016003	2	1	1	1	0	25	2	2	0	0	0	2	0	1	2	0	1	0	0	1
2016004	2	0	0	0	0	22	1	1	0	0	1	0	1	0	0	0	1	0	0	1
2016008	4	2	0	1	0	24	1	0	1	0	1	0	10	0	2	0	0	1	1	1
2016009	3	1	1	0	0	13	1	0	1	0	1	0	3	2	1	1	0	0	0	1
2016014	2	0	1	0	0	19	0	0	0	0	0	0	0	0	0	0	0	0	0	0
2016031	3	2	0	1	0	23	7	0	7	0	7	0	2	0	2	0	0	0	0	2
2016035	2	1	0	1	0	33	8	1	7	3	5	0	2	0	2	0	1	0	1	1
2016041	2	1	1	0	0	16	4	0	4	0	4	0	2	0	2	1	0	0	1	2
2016042	2	2	0	0	0	13	2	0	2	0	2	0	2	0	2	1	1	0	1	1
2016043	2	1	1	1	1	22	2	0	2	0	1	1	6	0	2	0	0	0	1	1
2016044	3	1	0	1	1	15	0	0	0	0	0	0	0	0	0	1	0	0	0	0
2016045	2	0	0	0	0	11	0	0	0	0	0	0	6	2	2	0	0	0	1	0
2016047	2	1	0	0	0	24	1	0	1	0	0	1	3	0	0	0	0	0	1	1
2016050	2	1	0	1	1	14	0	0	0	0	0	0	1	2	0	1	0	0	1	0
2016052	2	0	0	0	0	22	1	0	1	0	1	0	9	1	2	0	0	0	1	1
2016055	2	1	0	0	0	9	0	0	0	0	0	0	1	0	2	0	0	0	0	0
2016056	2	1	1	0	1	18	0	0	0	0	0	0	2	0	0	0	0	0	0	0
2016057	2	3	1	0	2	14	3	1	2	0	3	0	1	1	0	0	0	0	0	1
2016058	2	3	0	1	0	24	9	7	2	0	9	0	9	0	2	0	0	1	2	2
2016060	2	2	1	1	2	19	1	0	1	0	1	0	1	0	2	0	0	0	0	1
2016062	2	1	0	0	0	12	1	0	1	0	1	0	1	0	2	0	0	0	0	1
2016063	2	2	1	1	0	14	1	0	1	0	1	0	1	0	1	0	0	0	1	1
2016065	2	1	0	0	0	25	0	0	0	0	0	0	9	0	2	1	0	0	0	0
2016066	2	1	1	2	0	39	1	0	1	0	1	0	18	0	1	0	1	0	1	1
2016070	2	1	1	0	0	15	0	0	0	0	0	0	0	1	0	0	0	0	0	0
2016072	2	2	0	0	0	14	2	1	1	0	2	0	9	0	1	0	1	0	2	1
2016074	2	1	0	0	0	28	5	1	4	0	5	0	5	1	1	1	0	0	1	1
2016079	2	2	0	1	0	25	5	2	3	0	5	0	3	0	0	0	0	0	0	1
2016081	3	2	0	0	2	25	0	0	0	0	0	0	1	0	0	0	1	0	0	0
2016088	2	2	1	1	1	27	0	0	0	0	0	0	6	0	1	1	0	1	2	0
2016091	2	1	0	0	1	20	2	1	1	0	2	0	1	0	1	0	0	1	1	1
2016093	2	2	0	1	0	26	1	0	1	0	1	0	5	1	1	1	0	0	2	1
2016095	2	1	3	0	1	55	0	0	0	0	0	0	15	0	1	0	0	0	1	0
2016096	2	0	1	0	0	13	0	0	0	0	0	0	0	0	0	0	0	0	0	0
2016097	2	2	1	1	0	12	0	0	0	0	0	0	6	0	0	1	0	0	2	0
2016098	2	3	0	0	0	10	0	0	0	0	0	0	7	1	2	0	0	0	2	0
2016099	2	2	1	1	0	25	4	1	3	0	3	1	1	0	0	0	0	0	2	1
2016105	2	1	1	1	0	12	0	0	0	0	0	0	0	0	0	0	0	0	0	0
2016107	2	1	0	0.5	1	19	3	1	2	2	1	0	0	2	1	0	1	0	1	1
2016108	2	1	2	0	2	14	1	1	0	0	0	1	3	2	2	0	0	0	2	1
2016117	2	0	0	0	0	8	0	0	0	0	0	0	0	1	0	0	0	0	0	0
2016120	2	1	0	0	1	8	0	0	0	0	0	0	0	0	0	0	0	0	0	0
2016121	2	1	0	1	1	32	4	0	4	0	3	1	5	0	0	0	1	1	1	1
2016125	2	2	0	1	1	14	1	0	1	0	1	0	2	2	2	1	0	1	1	1
2016129	2	1	0	0	1	18	3	1	2	0	2	1	1	1	0	1	0	1	0	1
2016131	2	2	1	1	1	9	0	0	0	0	0	0	2	1	0	0	0	1	0	0
2016133	2	1	0	1	0	16	1	1	0	1	0	0	1	0	0	0	0	0	0	1
2016135	2	2	0	1	0	22	2	0	2	0	1	1	5	1	1	0	0	0	0	1
2016136	2	1	0	0	0	19	3	3	0	0	1	2	6	1	1	1	0	1	1	1
2016138	2	1	0	1	0	23	9	2	7	0	6	3	4	2	1	0	1	1	2	2
2016140	2	1	0	1	1	21	2	1	1	1	1	0	1	2	2	1	1	0	1	1
2016141	2	1	3	0	1	31	0	0	0	0	0	0	2	2	1	0	0	1	0	0
2016144	2	1	0	0	0	8	0	0	0	0	0	0	0	1	0	1	0	1	0	0
2016149	2	1	0	1	1	14	4	2	2	1	1	2	0	1	0	1	0	0	0	2
2016157	3	1	0	0	0	23	0	0	0	0	0	0	1	2	0	0	1	0	0	0
2016159	2	1	0	0	1	24	1	0	1	0	0	1	1	2	0	0	0	1	0	1
2016171	2	1	0	0	0	10	0	0	0	0	0	0	2	1	0	0	1	0	0	0
2016172	2	1	0	0	1	18	1	0	1	1	0	0	0	0	0	0	0	1	0	1
2016175	2	1	0	0	0	18	8	5	3	0	6	2	7	2	2	0	0	1	2	2
2016179	2	1	0	0	0	13	2	0	2	0	0	2	0	1	0	1	1	0	1	1
2016182	1	0	0	0	0	16	1	1	0	0	1	0	0	1	0	1	1	0	0	1
2016186	2	1	0	0	1	24	9	5	4	3	6	0	3	1	2	0	0	0	0	2
2016188	2	1	0	0	0	19	1	0	1	0	1	0	1	0	1	0	0	1	0	1
2016191	3	0	1	0	0	11	1	1	0	0	0	1	7	2	1	1	0	1	2	1
2016193	2	1	0	0	0	16	4	3	1	1	2	1	3	2	1	1	0	1	1	2
2016198	2	1	1	0	1	11	0	0	0	0	0	0	1	0	1	1	1	1	0	0
