# Supplementary material for: Serum uric acid level is correlated with the clinical, pathological progression and prognosis of IgA nephropathy: an observational retrospective pilot-study
Source: PeerJ. 2020 Nov 3;8:e10130. doi: 10.7717/peerj.10130 (PMC7646298; doi:10.7717/peerj.10130)
Supplement: Supplemental Information 3 [file peerj-08-10130-s003.xlsx]

## Sheet: Sheet1
Specimen No.	follow-up time (months)	endpoint
2015002	38	0
2015008	-	loss to follow-up
2015009	39	0
2015010	40	0
2015015	29	0
2015016	34	0
2015018	24	0
2015019	33	0
2015020	39	0
2015022	39	0
2015036	24	0
2015038	2	loss to follow-up
2015040	36	0
2015043	37	0
2015046	37	0
2015056	37	0
2015058	9	loss to follow-up
2015059	22	0
2015061	38	0
2015063	-	loss to follow-up
2015067	-	loss to follow-up
2015069	38	0
2015073	-	loss to follow-up
2015075	12	1
2015083	-	loss to follow-up
2015084	37	0
2015085	-	loss to follow-up
2015087	35	0
2015090	36	0
2015100	36	0
2015108	36	0
2015109	-	loss to follow-up
2015110	37	0
2015112	25	0
2015116	17	0
2015120	33	0
2015122	17	0
2015128	36	0
2015132	36	0
2015133	34	0
2015134	-	loss to follow-up
2015135	36	0
2015136	15	0
2015139	-	loss to follow-up
2015142	35	0
2015144	31	0
2015145	36	0
2015149	28	0
2015150	25	0
2015152	35	0
2015153	36	0
2015159	32	0
2015162	35	0
2015168	36	0
2015173	30	1
2015177	36	0
2015183	34	0
2015186	25	0
2015192	31	0
2015193	34	0
2015199	35	0
2015200	27	0
2015202	34	0
2015211	34	0
2015214	-	loss to follow-up
2015217	34	1
2015225	34	0
2015228	33	0
2015240	35	0
2015242	34	0
2015246	33	0
2015249	34	0
2015250	18	1
2015254	30	0
2015257	34	0
2015266	32	0
2015268	34	0
2015269	33	0
2015270	18	0
2015271	-	loss to follow-up
2015274	26	0
2015275	33	0
2015277	3	loss to follow-up
2015279	32	0
2015282	31	0
2015284	33	0
2015286	21	0
2015289	34	0
2015291	33	0
2015292	31	0
2015293	31	1
2015297	28	0
2015298	22	0
2015299	22	0
2015302	31	0
2015303	20	0
2015304	32	0
2015306	30	1
2015313	33	0
2015315	22	0
2015322	21	0
2015330	19	0
2015332	21	0
2015338	17	1
2015342	25	0
2015352	21	0
2015355	21	0
2015357	16	1
2015360	27	0
2015361	29	0
2015363	25	0
2015364	29	loss to follow-up
2015365	6	loss to follow-up
2015366	27	1
2015369	31	0
2015378	20	0
2015381	26	0
2015390	30	0
2015397	14	0
2015401	19	0
2015402	30	0
2015407	29	0
2015408	29	0
2015409	18	0
2015416	29	0
2015418	30	0
2015420	-	loss to follow-up
2015424	15	0
2015431	29	0
2015435	14	0
2015437	28	0
2015439	19	0
2015441	19	0
2015448	16	0
2015458	26	0
2015461	28	0
2015463	-	loss to follow-up
2015464	11	loss to follow-up
2015469	28	0
2015471	18	0
2015473	28	0
2015476	25	0
2016003	27	0
2016004	17	0
2016008	27	0
2016009	21	0
2016014	13	0
2016031	26	0
2016035	25	0
2016041	19	0
2016042	24	0
2016043	25	0
2016044	22	0
2016045	26	0
2016047	24	0
2016050	15	1
2016052	23	0
2016055	14	0
2016056	21	0
2016057	-	loss to follow-up
2016058	23	0
2016060	25	0
2016062	24	0
2016063	16	0
2016065	21	0
2016066	14	0
2016070	16	0
2016072	13	0
2016074	24	0
2016079	24	0
2016081	24	0
2016088	13	0
2016091	24	0
2016093	-	loss to follow-up
2016095	13	0
2016096	12	0
2016097	22	0
2016098	24	0
2016099	24	0
2016105	13	0
2016107	12	0
2016108	24	0
2016117	23	0
2016120	17	0
2016121	21	0
2016125	20	0
2016129	20	0
2016131	24	0
2016133	12	0
2016135	24	0
2016136	7	loss to follow-up
2016138	23	0
2016140	24	0
2016141	18	0
2016144	24	0
2016149	23	0
2016157	19	0
2016159	24	0
2016171	2	loss to follow-up
2016172	22	0
2016175	23	0
2016179	23	0
2016182	13	0
2016186	12	0
2016188	21	0
2016191	22	0
2016193	20	0
2016198	6	loss to follow-up
